# Supplementary material for: In vitro propagation of three mosaic disease resistant cassava cultivars
Source: PubMed Central journal article supplement (PMC7526170; doi:10.1186/s12896-020-00645-8), 2020-09-29

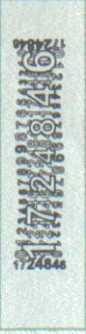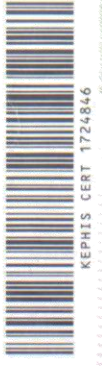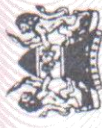

PERMIT No. **KEPHIS/21190/2018**

REPUBLIC OF KENYA  
**MINISTRY OF AGRICULTURE & RURAL DEVELOPMENT**  
**KENYA PLANT HEALTH INSPECTORATE SERVICE (KEPHIS)**  
**PLANT IMPORTATION PERMIT**

(Plant Protection Act Cap 324) Date **9 October, 2018**

The importer must furnish the supplier with a copy of this import permit before plant material is despatched.

\*Permission is hereby granted to **AMITCHIHOUE FRANK SESSOU, PAUSTI**  
of **P.O. BOX 62000-00200, NAIROBI, KENYA**  
to import from **JEROME HOUNGUE, UNIVERSITY OF ABOMEY-CALAVI**

the following **Stems**  
**100 Stems Manihot esculenta**  
subject to the following conditions

- 1) All **Stems** to be the produce of and grown in **BENIN**
- 2) The consignment to be inspected on arrival and the importing authority reserves the right to treat, destroy or refuse the importation.
- 3) Plants or plantparts must be entirely free from soil, chaff and/or leaf mould.
- 4) Each consignment shall be accompanied by an original copy of this import permit and Phytosanitary Certificate (International Model or its equivalent) from country of origin;

Additional Declarations:

- i) **The Material must be used for Research purposes only**
  - ii) **Nature of research to be declared on request by KEPHIS inspector.**
  - iii) **To be used in approved quarantine facility.**
- Details to be stated on the Phytosanitary Certificate.

Failure to furnish the required certificates may result in prohibition of entry of the plant materials.

5) **Packaging** The following materials must **not** be used: banana leaves, maize, rice, sorghum, palm, wheat straw soil or leaf mould. If any other plant residue is used as packaging material, the consignment must be accompanied by a certificate stating: all seeds, pathogens and insects have been killed before use of the material either by heating to 180°F / 83°C for ten minutes or by chemical treatment (N.B.- Details to be stated on Phytosanitary Certificate).

This permit is valid for six months from date of issue, but may be cancelled at any time by the Director of Agriculture or by the officer issuing the permit on his behalf

Official Stamp

**REGINA WACERA KABRU**

(Signed)   
for Director of Agriculture

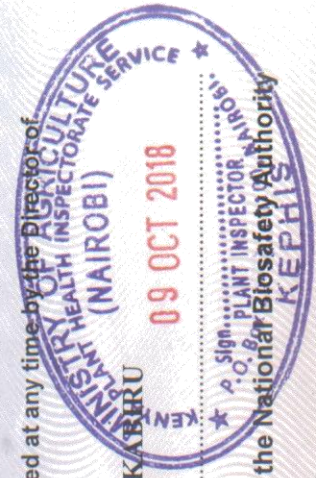

"Import of genetically modified material will require clearance from the National Biosafety Authority in compliance with the Biosafety Act"

\*The permission hereby granted is additional to any permission or licence required under any other law.  
Full name and address of supplier to be stated

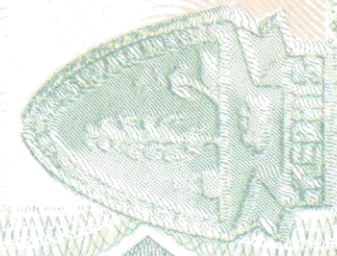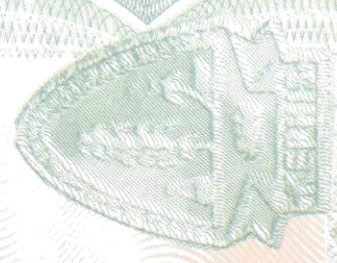

REPUBLIQUE DU BENIN  
MINISTERE DE L'AGRICULTURE  
DE L'ELEVAGE ET DE LA PECHE

**DIRECTION DE LA PRODUCTION VEGETALE**

**1 SERVICE DE LA PROTECTION DES VEGETAUX  
ET DU CONTROLE PHYTOSANITAIRE**

01 BP 58 Porto-Novo  
Tél.: +229 20 21 32 90 / 20 21 32 93 - Fax : +229 20 21 44 13 -  
spv.benin@yahoo.fr

SPV

**CERTIFICAT PHYTOSANITAIRE**  
**N° 0054994/19/SPVCP/PCP - AEB**

1 Le Service de la Protection des Végétaux  
et du Contrôle Phytosanitaire du Bénin

Au  
Service de la Protection des Végétaux de  
**KENYA.**  
Lieu d'origine  
**BENIN.**

4 Nom et adresse de l'expéditeur

**SESSOU A. FRANCH.**  
**TEL: 95906976**

5 Nom et adresse du destinataire

**SESSOU A. FRANCH.**  
**JUJA KENYA.**

6 Moyen de transport déclaré

Point d'entrée déclaré  
**JUJA.**

8 Marques des colis : nombre et nature des colis : nom commun du produit/organisme animal : nom scientifique des plantes/organismes animaux

**0 COLIS d'échantillon de produit**  
**Agricole:**

**- Boutures de : Manihot esculenta.**

9 Quantité déclarée

**07kg.**

10 Il est certifié que les végétaux ou produits végétaux ou organismes animaux décrits ci-dessus - ont été inspectés suivant des procédures adaptées, et - estimés indemnes d'ennemis visés par la réglementation et pratiquement indemnes d'autres ennemis dangereux et - sont jugés conformes à la réglementation phytosanitaire en vigueur dans le pays importateur.

11 Déclaration supplémentaire

**ECHANTILLON (SAMPLE)**

**TRAITEMENT DE DESINFECTATION ET/OU DE DESINFECTION**

12 Traitement

**NEANT**

18 Lieu de délivrance

**Cobrou**

13 Produit chimique (matière active)

**NEANT**

14 Durée et température

**NEANT**

15 Concentration

**NEANT**

16 Date

**NEANT**

17 Renseignements complémentaires

**NEANT.**

20 Nom et signature du  
Fonctionnaire autorisé

*[Signature]*

21 Cachet de l'organisation

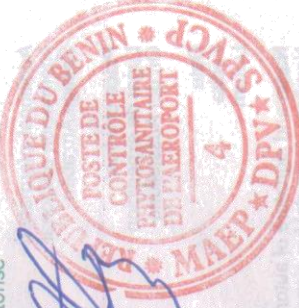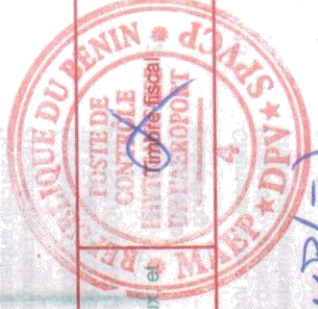

Supplement: 12896_2020_645_MOESM4_ESM.pdf [file 12896_2020_645_MOESM4_ESM.pdf]
