# Supplementary material for: In vitro propagation of three mosaic disease resistant cassava cultivars
Source: PubMed Central journal article supplement (PMC7526170; doi:10.1186/s12896-020-00645-8), 2020-09-29

Acclimatization of plantlets

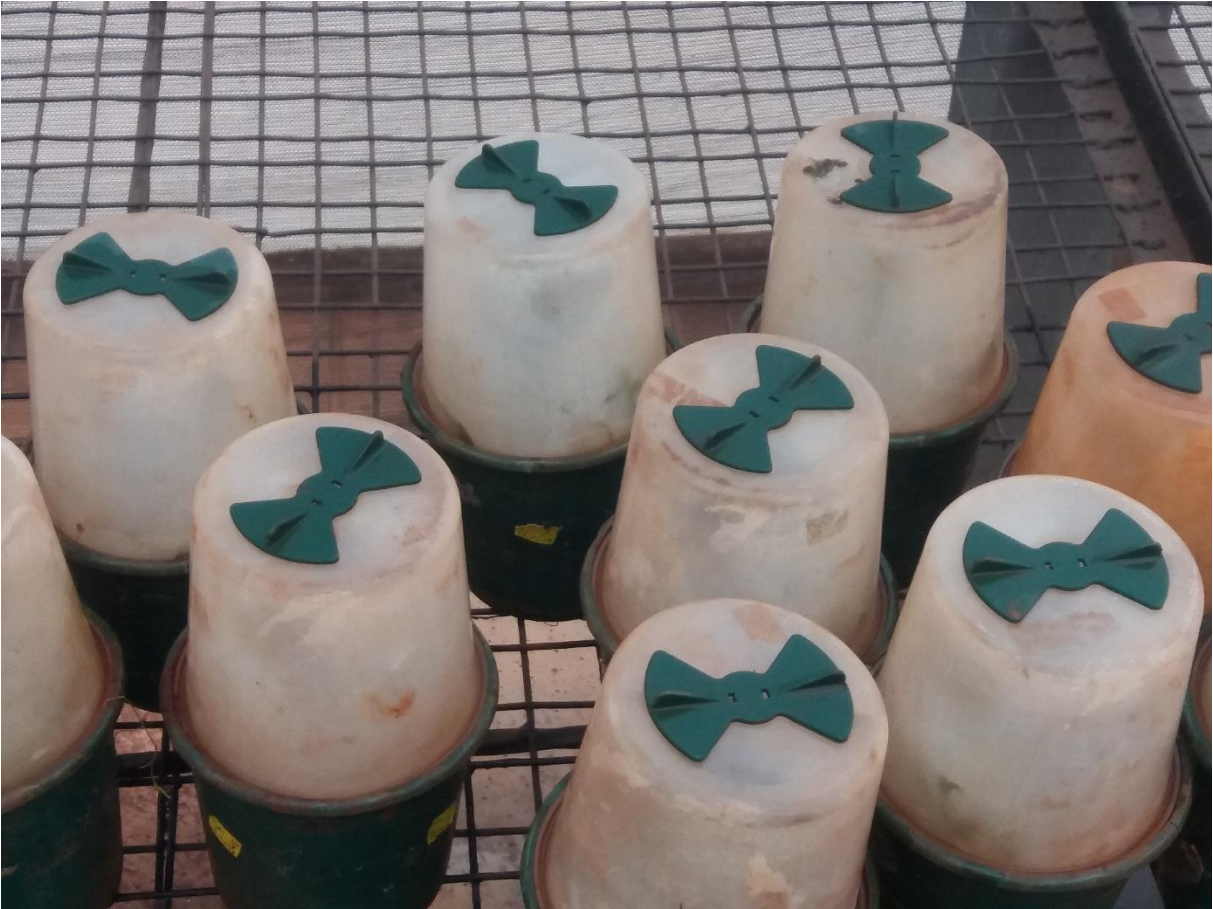

Supplement: 12896_2020_645_MOESM6_ESM.pdf [file 12896_2020_645_MOESM6_ESM.pdf]
