# Supplementary material for: In vitro propagation of three mosaic disease resistant cassava cultivars
Source: PubMed Central journal article supplement (PMC7526170; doi:10.1186/s12896-020-00645-8), 2020-09-29

C1 = mother plants of Agric-rouge; R1 = Regenerated plants of Agric-rouge; C2 = mother plants of Atinwewe; R2 = Regenerated plants of Atinwewe; C3 = mother plants of Aglehoundo; R3 = Regenerated plants of Aglehoundo.

SCARs amplification of CMD2 in Cassava

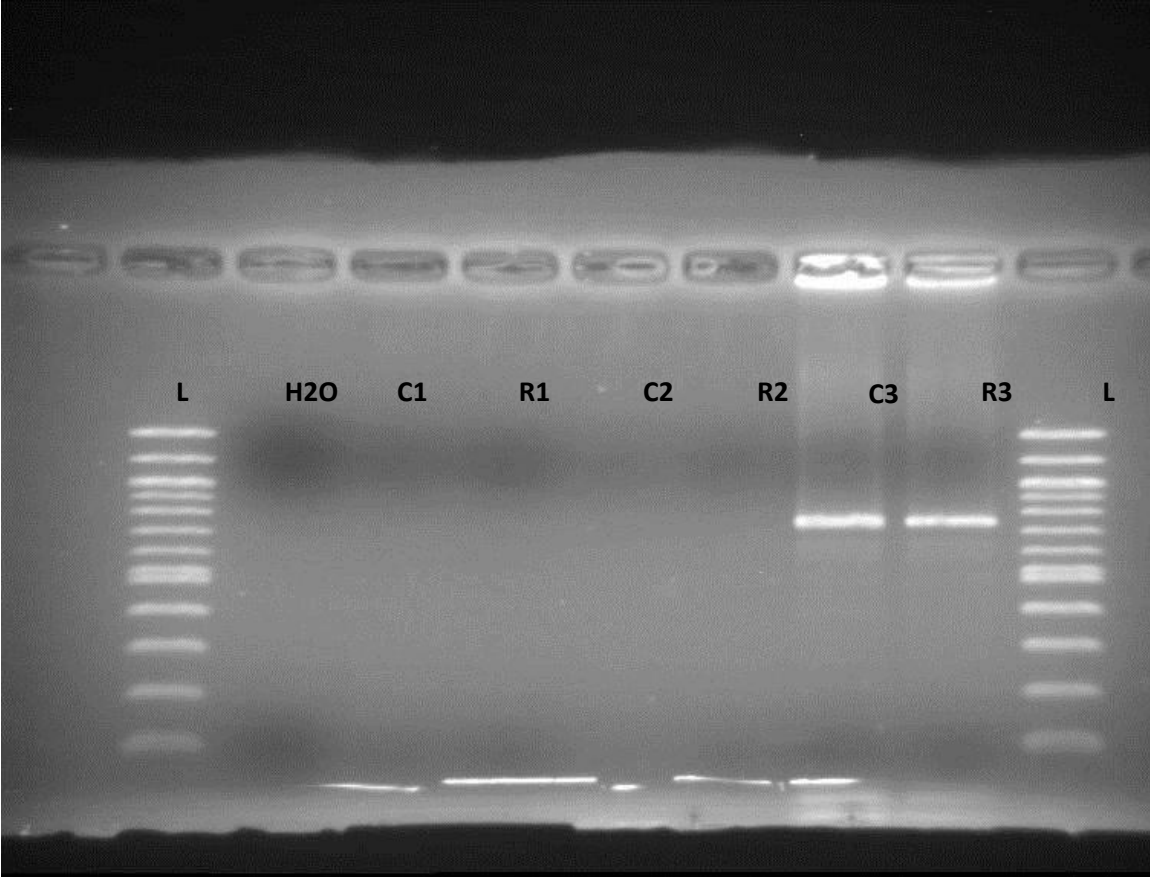

SSRs amplification of CMD2 in cassava

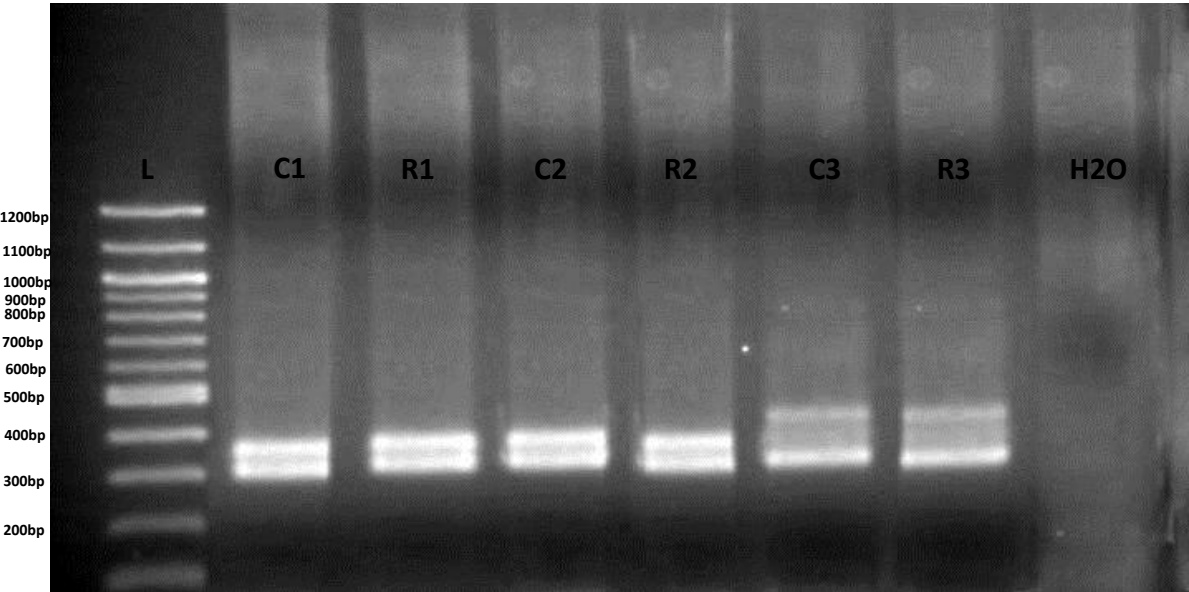

Supplement: 12896_2020_645_MOESM8_ESM.pdf [file 12896_2020_645_MOESM8_ESM.pdf]
